# Supplementary figures and images for: An airtight-cavity-structural triboelectric nanogenerator-based insole for high performance biomechanical energy harvesting
Source: Royal Society of Chemistry journal article supplement (doi:10.1039/c9nr00083f), 2019-01-01

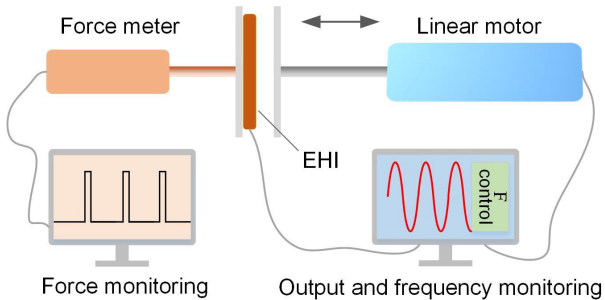

Supplement: c9nr00083f3.pdf [file c9nr00083f3.pdf]

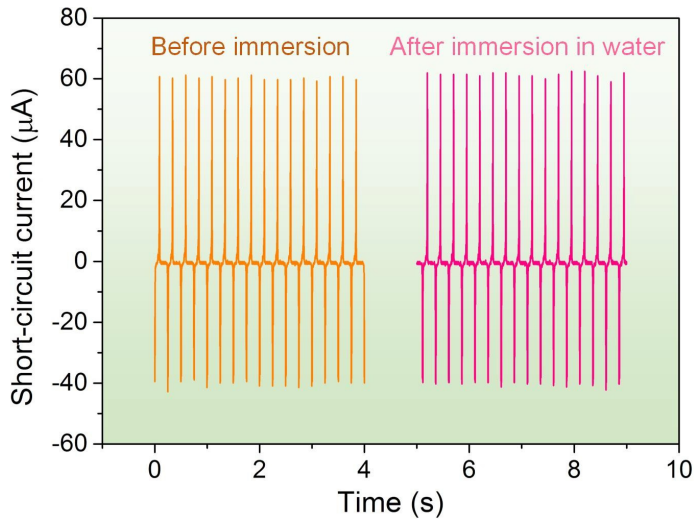

Supplement: c9nr00083f4.pdf [file c9nr00083f4.pdf]

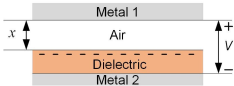

Supplement: c9nr00083f5.pdf [file c9nr00083f5.pdf]

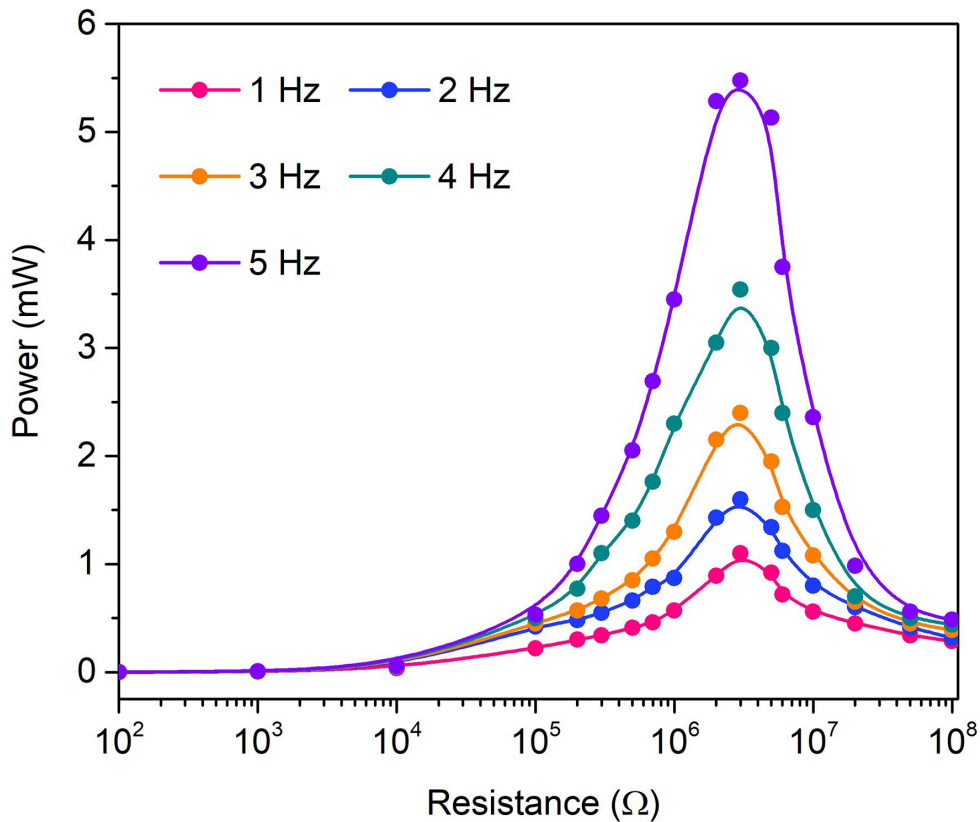

Supplement: c9nr00083f6.pdf [file c9nr00083f6.pdf]
